# Supplementary material for: Secretion of Interleukin 6 in Human Skeletal Muscle Cultures Depends on Ca2+ Signalling
Source: MDPI journal article supplement (doi:10.3390/biology12070968), 2023-07-07
Supplement: s1 [file s1]

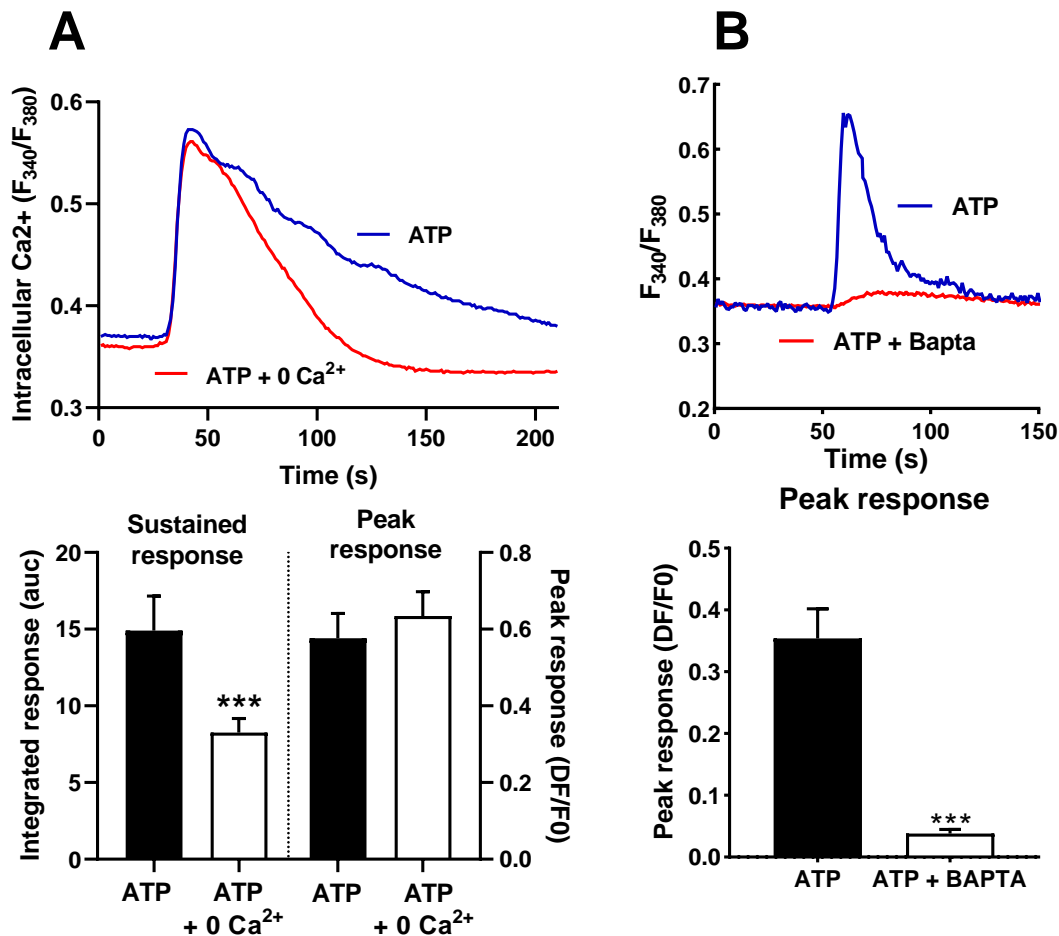

### S1. Effect of removal of extracellular $\text{Ca}^{2+}$ in the $[\text{Ca}^{2+}]_i$ response to ATP.

**A.** 500  $\mu\text{M}$  ATP was applied in normal medium (Tyrode solution containing 1.8 mM  $\text{Ca}^{2+}$ ) or in a low  $\text{Ca}^{2+}$  medium (0 $\text{Ca}^{2+}$  added plus 1 mM EGTA) after 15 min pretreatment with the same medium. Representative average trace of 12 (ATP) and 16 (ATP+0 $\text{Ca}^{2+}$ ) cells. Bottom panel compares the integrated response (area under the curve for 180 seconds, arbitrary units) and the peak response (DF/F0) of the cells represented in A. \*\*\*  $p < 0.005$ , respect ATP, t test.

**B.** Representative trace of the ATP response in control cells and in cells loaded with Bapta-AM (20 min, 10  $\mu\text{M}$ ). Bottom histogram compares average peak response for treated and control cells. \*\*\*  $p < 0.005$ , t test.  $n = 25$  (ATP) and 55 (ATP+Bapta) cells.
