# Supplementary material for: Secretion of Interleukin 6 in Human Skeletal Muscle Cultures Depends on Ca2+ Signalling
Source: MDPI journal article supplement (doi:10.3390/biology12070968), 2023-07-07
Supplement: s1 [file s1]

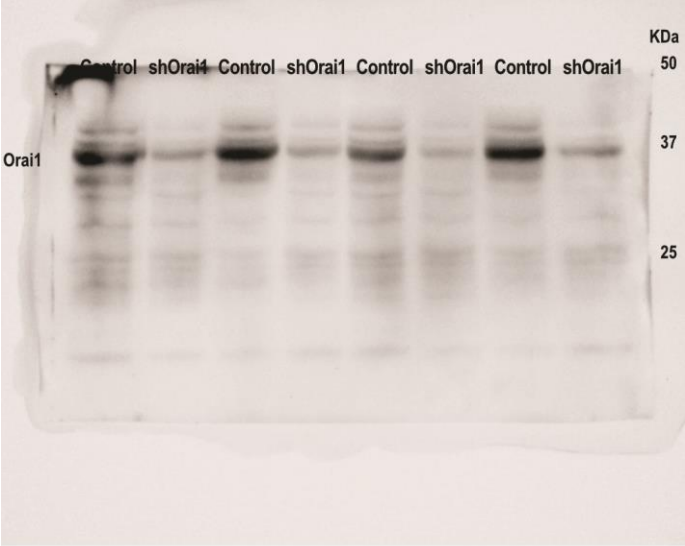

|             | Control | shOrai1 | Control | shOrai1 | Control | shOrai1 | Control | shOrai1 |
|-------------|---------|---------|---------|---------|---------|---------|---------|---------|
| Orai1       | 41603.4 | 9051.1  | 32479.7 | 6121.7  | 20412.2 | 7432.6  | 32686.4 | 10004.0 |
| Beta actin  | 34603.8 | 37395.4 | 29410.4 | 28465.1 | 27211.2 | 27564.7 | 31377.1 | 25631.0 |
| Orai/Bactin | 1.202   | 0.242   | 1.104   | 0.215   | 0.750   | 0.270   | 1.042   | 0.390   |
|             |         |         |         |         |         |         |         |         |
|             |         | Mean    | s.e.m   |         |         |         |         |         |
|             | Control | 1.025   | 0.097   |         |         |         |         |         |
|             | shOrai1 | 0.279   | 0.039   |         |         |         |         |         |

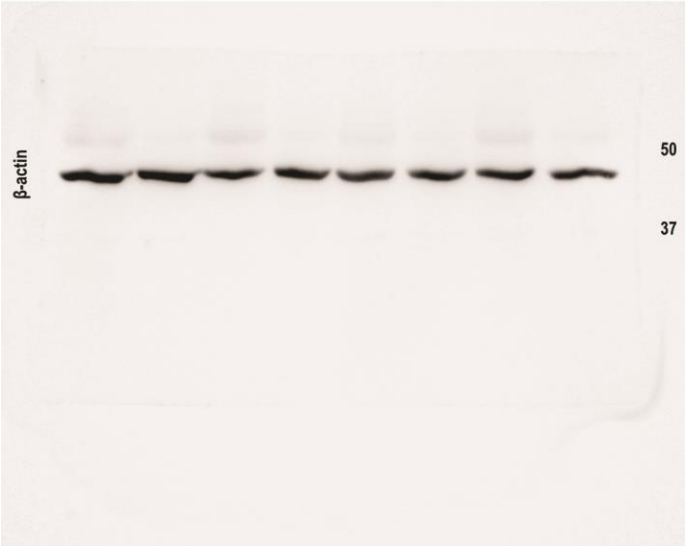

Four samples, corresponding to 4 independent cultures non treated (Control) or transfected (shOrai1) with silencing plasmid shOrai1 were used to perform WB. The Table shows individual readings (OD) for each band and the normalized signal, as well as the average (and s.e.m) value for Control and transfected samples.
